# Supplementary material for: On a recursive formulation for solving inverse form finding problems in isotropic elastoplasticity
Source: Springer Nature journal article supplement (doi:10.1186/2213-7467-1-10), 2014-01-01

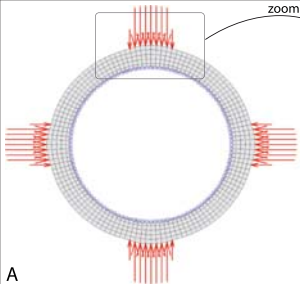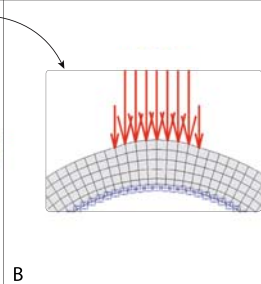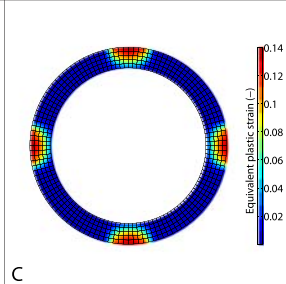

Supplement: 40323_2013_9_MOESM11_ESM.pdf [file 40323_2013_9_MOESM11_ESM.pdf]
